# Supplementary material for: Enhanced Visible-Light-Driven Photocatalysis of Ag/Ag2O/ZnO Nanocomposite Heterostructures
Source: MDPI journal article supplement (doi:10.3390/nano12152528), 2022-07-23
Supplement: s1 [file s1]

Supporting information:

# Enhanced Visible-Light-Driven Photocatalysis of Ag/Ag<sub>2</sub>O/ZnO Nanocomposite Heterostructures

Chadrsekhar Loka \* and Kee-Sun Lee \*

Department of Advanced Materials Engineering & Smart Natural Space Research Center, Kongju National University, Cheonan 31080, Korea

\* Correspondence: csloka89@gmail.com (C.L.); kslee@kongju.ac.kr (K.-S.L.)

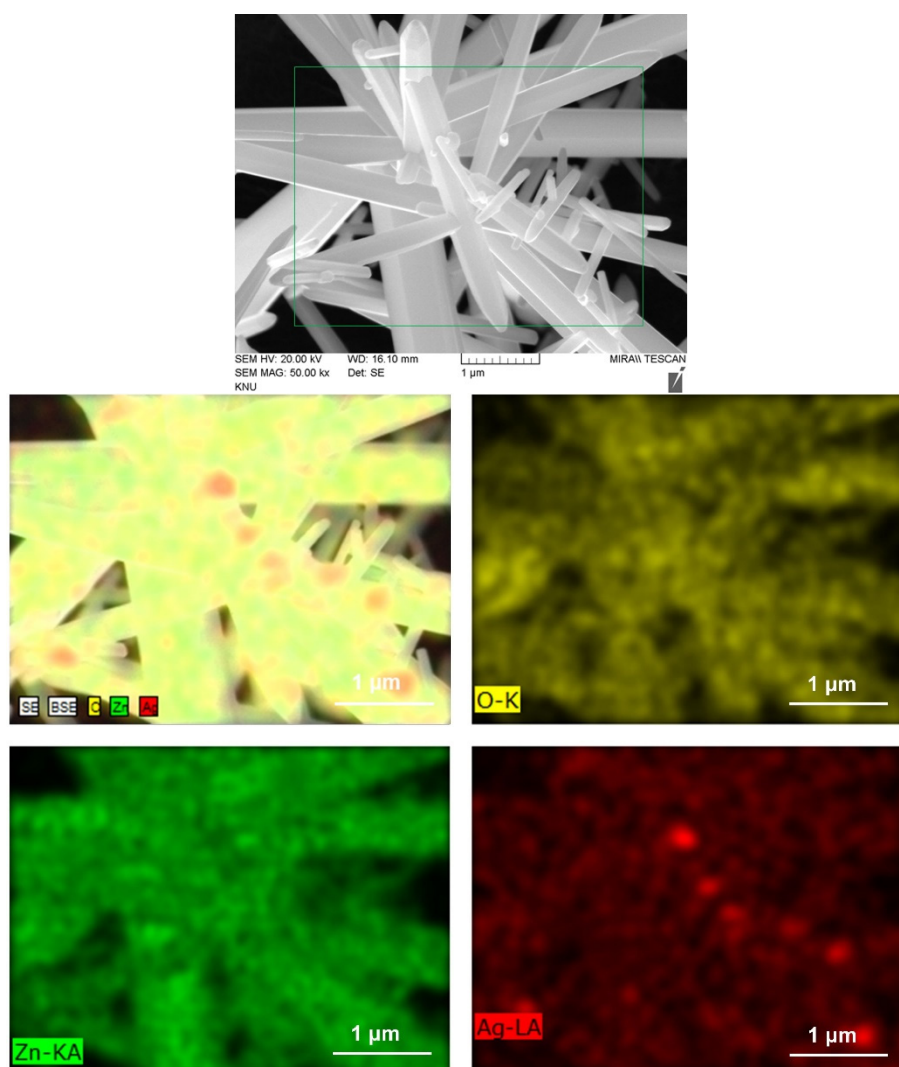

**Figure S1.** SEM image with corresponding EDX elemental mapping images of Zn, Ag, and O correspond to the 5% Ag-ZnO photocatalyst.

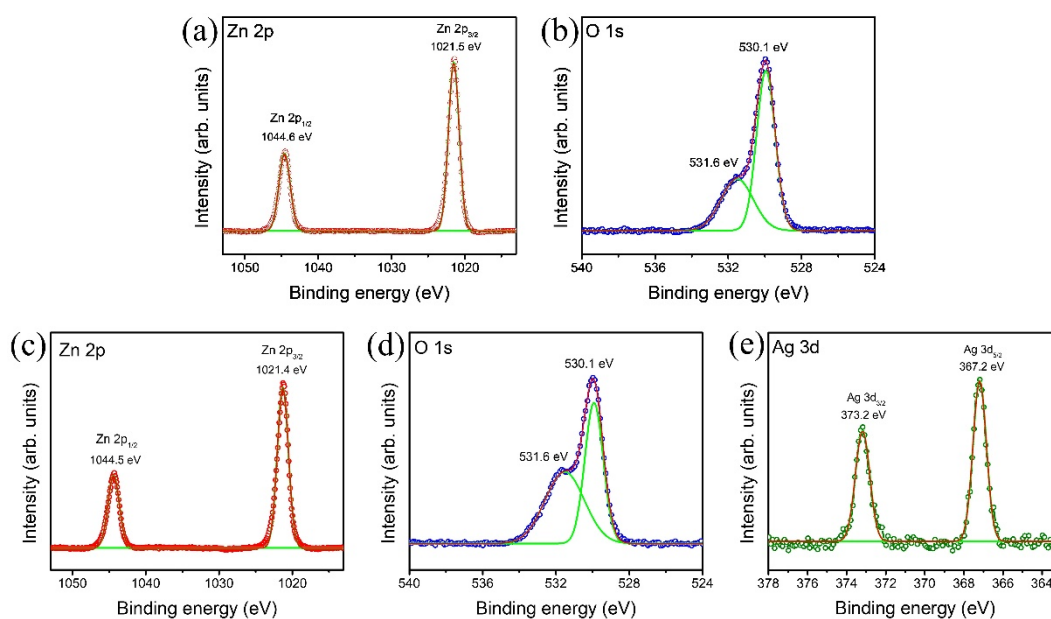

**Figure S2.** High-resolution XPS spectra of the pure ZnO (a, b), and 2% Ag-ZnO (c-e).

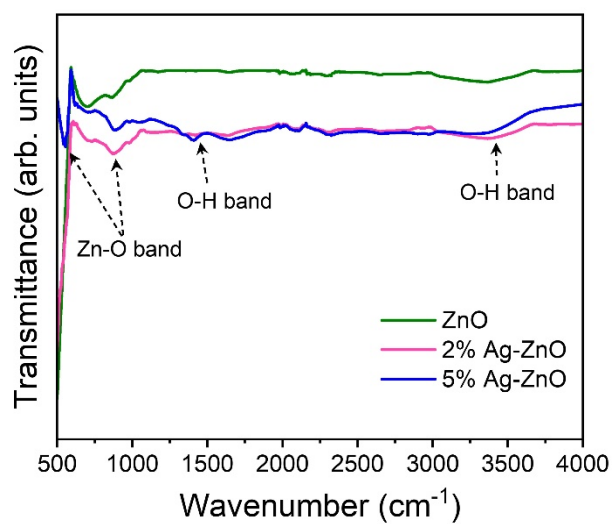

**Figure S3.** FTIR spectra of the pure ZnO, 2% Ag-ZnO, and 5% Ag-ZnO samples.

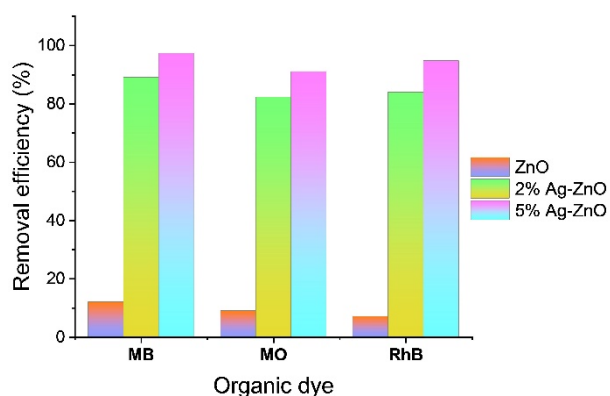

**Figure S4.** Photocatalytic removal efficiency of the ZnO, 2% Ag-ZnO, and 5% Ag-ZnO within 60 min under visible light irradiation for methylene blue (MB), methyl orange (MO), and rhodamine (RhB).

**Table S1.** Photocatalytic performance of the pure ZnO, 2% Ag-ZnO, and 5% Ag-ZnO under visible light irradiation for different organic dyes MB, MO, and RhB.

| Sample   | Dye degradation efficiency (%) |      |      | Rate constant, k (min <sup>-1</sup> ) |                      |                       |
|----------|--------------------------------|------|------|---------------------------------------|----------------------|-----------------------|
|          | MB                             | MO   | RhB  | MB                                    | MO                   | RhB                   |
| ZnO      | 12                             | 9    | 7    | $0.2 \times 10^{-2}$                  | $0.1 \times 10^{-2}$ | $0.09 \times 10^{-2}$ |
| 2%Ag-ZnO | 89.1                           | 82.3 | 84.0 | $3.6 \times 10^{-2}$                  | $2.8 \times 10^{-2}$ | $3.1 \times 10^{-2}$  |
| 5%Ag-ZnO | 97.3                           | 91.1 | 94.8 | $5.7 \times 10^{-2}$                  | $3.7 \times 10^{-2}$ | $5.1 \times 10^{-2}$  |
